# Supplementary material
Source: Springer Nature journal article supplement (https://www.springermedizin.de/resource/supplementary/12890_2013_486_MOESM3_ESM.pdf/9505566)
Supplement: MOESM3 [file 9505566]

**Online Supplementary Table 1 Comparison of the inter-observer agreement (Intra-class correlation\*)**

| <b>CT parameters</b>       | <b>ICC*</b> | <b>Confidence interval</b> |      |
|----------------------------|-------------|----------------------------|------|
| EXP1 <sub>MLD</sub>        | 1           | .                          | .    |
| EXP1- <sub>850-910</sub>   | 1           | .                          | .    |
| EXP1- <sub>850-1024</sub>  | 1           | .                          | .    |
| EXP2 <sub>MLD</sub>        | 0.95        | 0.92                       | 0.97 |
| EXP2- <sub>850-910</sub>   | 0.99        | 0.98                       | 0.99 |
| EXP2- <sub>850-1024</sub>  | 0.99        | 0.98                       | 0.99 |
| EXP3 <sub>MLD</sub>        | 1           | .                          | .    |
| EXP3- <sub>850-910</sub>   | 1           | .                          | .    |
| EXP3- <sub>850-1024</sub>  | 1           | .                          | .    |
| EXP4 <sub>MLD</sub>        | 1           | .                          | .    |
| EXP4- <sub>850-910</sub>   | 0.91        | 0.89                       | 0.92 |
| EXP4- <sub>850-1024</sub>  | 0.96        | 0.95                       | 0.98 |
| INSP1 <sub>MLD</sub>       | 0.90        | 0.88                       | 0.95 |
| INSP1- <sub>850-910</sub>  | 0.97        | 0.94                       | 0.99 |
| INSP1- <sub>850-1024</sub> | 0.92        | 0.88                       | 0.95 |
| INSP2 <sub>MLD</sub>       | 0.97        | 0.96                       | 0.99 |
| INSP2- <sub>850-910</sub>  | 0.95        | 0.93                       | 0.97 |
| INSP2- <sub>850-1024</sub> | 1           | .                          | .    |
| INSP3 <sub>MLD</sub>       | 0.99        | 0.98                       | 0.99 |
| INSP3- <sub>850-910</sub>  | 0.99        | 0.98                       | 0.99 |
| INSP3- <sub>850-1024</sub> | 0.99        | 0.98                       | 0.99 |
| INSP4 <sub>MLD</sub>       | 0.99        | 0.98                       | 0.99 |
| INSP4- <sub>850-910</sub>  | 0.98        | 0.98                       | 0.99 |
| INSP4- <sub>850-1024</sub> | 0.99        | 0.98                       | 0.99 |

ICC was calculated on the raw variables measured by the 2 observers.

Exp <sub>-850-910</sub>: Lung voxels having attenuation between -850 and -910 HU on expiratory slices at each level. Exp <sub>-850-1024</sub>: Lung voxels having attenuation between -850 and -1024 HU on expiratory slices at each level. INSP <sub>-850-910</sub>: Lung voxels having attenuation between -850 and -910 HU on inspiratory images. INSP <sub>-850-1024</sub>: Lung voxels having attenuation between -850 and -1024 on inspiration set matched images. MLD = Mean lung density.
